# Supplementary material for: Mesenchymal to amoeboid transition is associated with stem-like features of melanoma cells
Source: PubMed Central journal article supplement (PMC4022383; doi:10.1186/1478-811x-12-24), 2014-04-01

**A**

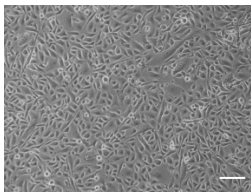

**PC3 alone**

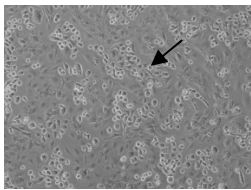

**PC3/EPC co-culture**

**C**

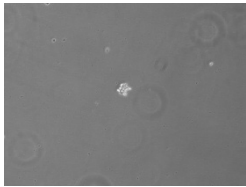

**PC3 alone**

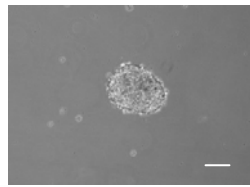

**PC3/EPC co-culture**

**B**

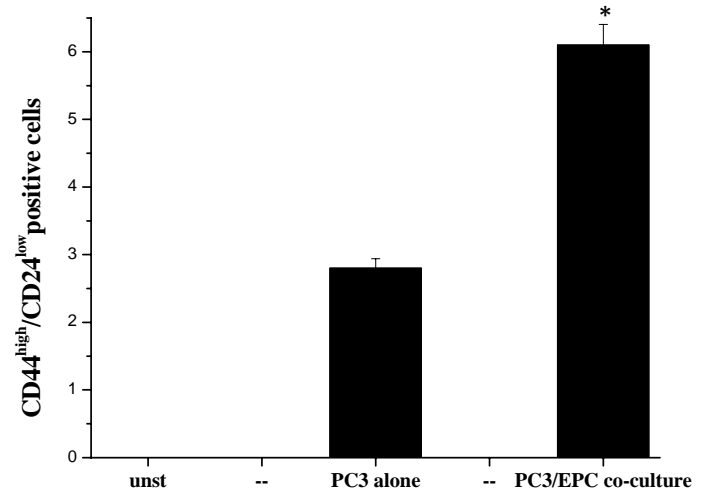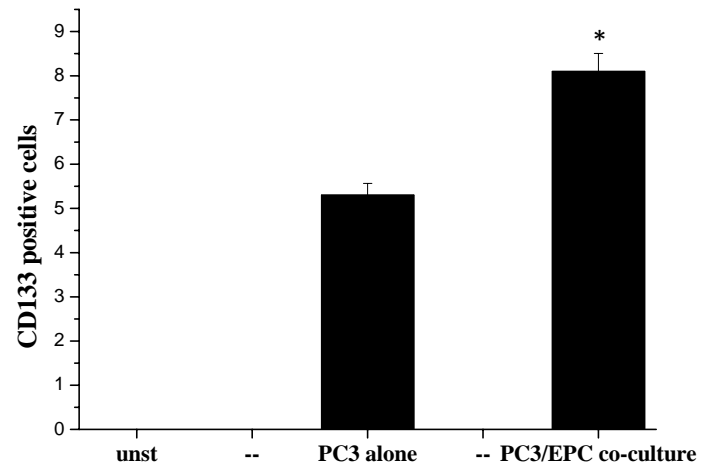

Supplement: 1478-811X-12-24-S2.pdf [file 1478-811X-12-24-S2.pdf]
